# Supplementary material for: The α-melanocyte stimulating hormone/peroxisome proliferator activated receptor-γ pathway down-regulates proliferation in melanoma cell lines
Source: Springer Nature journal article supplement (doi:10.1186/s13046-017-0611-4), 2017-10-11
Supplement: MOESM2 [file 15127190]

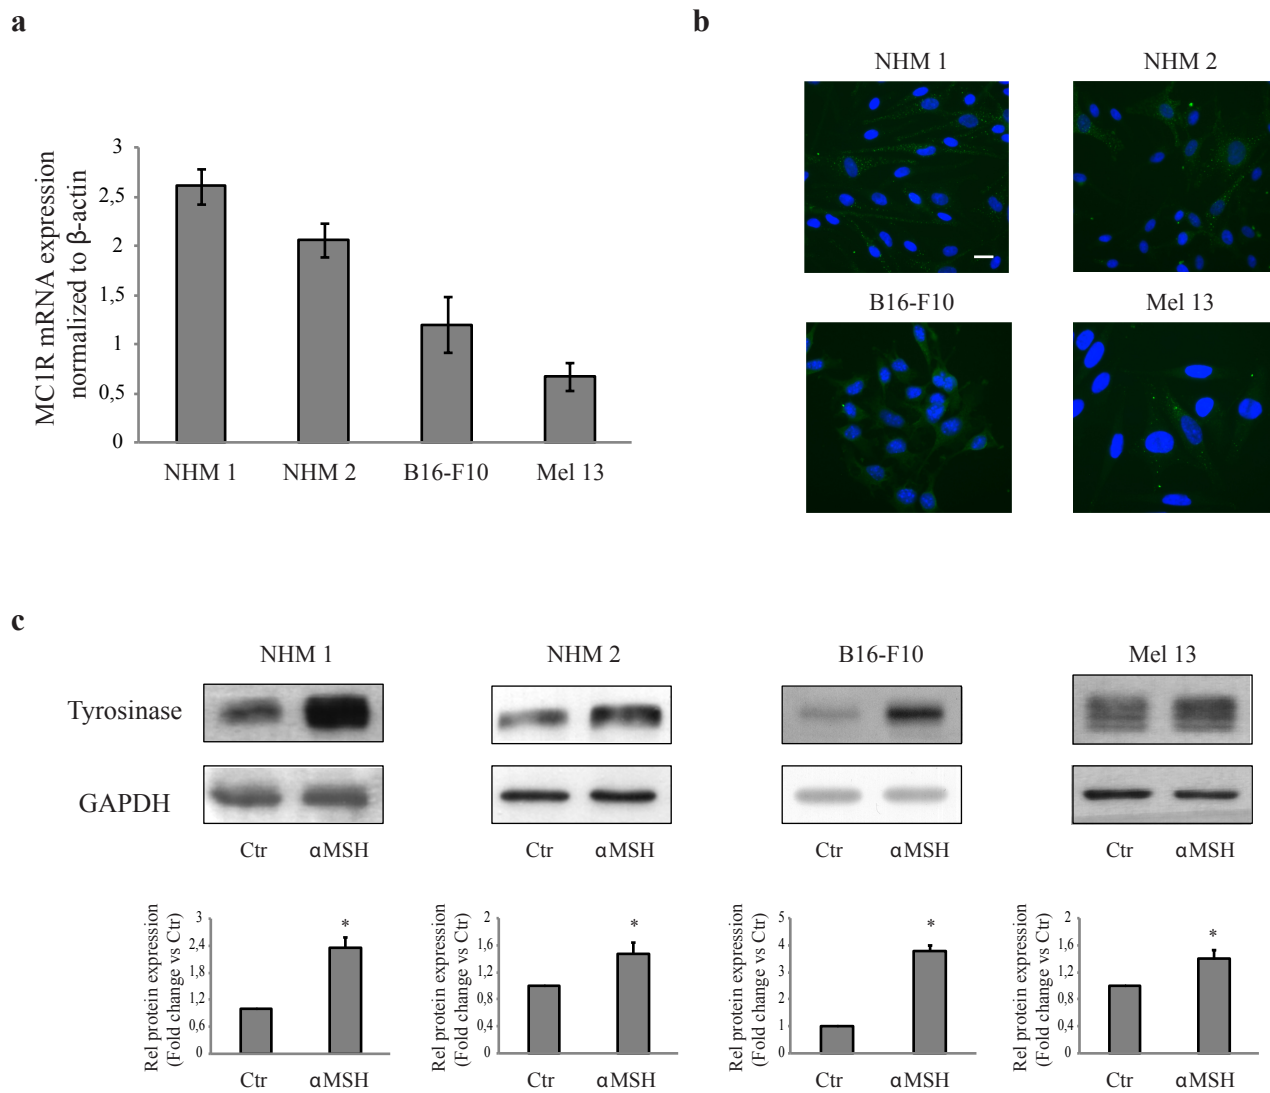

Figure S1
